# Supplementary material for: Customization in mobile health apps: explaining effects on physical activity intentions by the need for autonomy
Source: PubMed Central journal article supplement — Digit Health. 2019 Nov 10;5:2055207619888074. doi: 10.1177/2055207619888074 (PMC6880050; doi:10.1177/2055207619888074), 2019-11-10
Supplement: DHJ888074_Supplementary_material.pdf [file DHJ888074_Supplementary_material.pdf]

Customization in Mobile Health Apps: Explaining Effects on Physical Activity Intentions by  
the Need for Autonomy

Supplementary File:

Survey Items of Perceived Active Control, Autonomous Motivation, Intention to Engage in  
Physical Activity, and Need for Autonomy

### **PERCEIVED ACTIVE CONTROL [PAC]**

To what extent do you agree with the following statements about the demo health app you just looked at:

**PAC1** I could choose freely what I wanted to see in the app.

**PAC2** While I used the app, I was always aware where in the app I was.

**PAC3** While I used the app, I always knew where I was going.

**PAC4** I feel that I have a great deal of control over my visiting experience in this app.

*[measured on 7-point Likert scales:*

*1 = Strongly disagree,*

*2 = Disagree,*

*3 = Somewhat disagree,*

*4 = Neither agree or disagree,*

*5 = Somewhat agree,*

*6 = Agree,*

*7 = Strongly agree]*

### **AUTONOMOUS MOTIVATION [AM]**

I would use a health-related smartphone app because...

**AM1** Using health-related smartphone apps is fun.

**AM2** I enjoy learning new skills through health-related smartphone apps.

**AM3** The outcome from using a health-related smartphone app is exiting.

**AM4** Using a health-related smartphone app is an enjoyable way to learn new skills/techniques.

*[measured on 7-point Likert scales:*

*1 = Strongly disagree,*

*2 = Disagree,*

*3 = Somewhat disagree,*

*4 = Neither agree or disagree,*

*5 = Somewhat agree,*

*6 = Agree,*

*7 = Strongly agree]*

## **INTENTION TO ENGAGE IN PHYSICAL ACTIVITY [PA]**

What is your opinion on the following statement? Please indicate your opinion using the two answer scales:

“I intend to engage in physical activity (e.g., walking, moving, biking, swimming, exercising etc.) for at least 30 minutes, 5 times a week for the next 3 months.”

*[measured on a 7-point semantic differential scale:*

*1 = Very likely,*

*7 = Very unlikely] (Reversed coded)*

*[measured on a 7-point semantic differential scale:*

*1 = Strongly disagree,*

*7 = Strongly agree]*

## **NEED FOR AUTONOMY [NA]**

Now we will present you with five health related situations. What are you the most likely to do in each situation below?

**NA1** You are considering making changes to your health (e.g. improving your diet or exercising more often). How likely are you to: Decide for yourself which type of changes you would like to make?

**NA2** You have been advised that setting goals is a good way to motivate yourself to change your health behaviours. How likely are you to: Set your own goals?

**NA3** During a discussion with a health professional (your doctor, a physiotherapist etc.), he/she presents you with several options on the best way for you to reach your health goal (e.g. get in better physical shape). How likely is your first thought: What do I think is the best option for me?

**NA4** In the past, when you needed to become more motivated to do something for your health (e.g. exercise more, change your diet, move more during a day at the school/office). How likely would you say that you: Found the motivation yourself?

**NA5** You find out from your doctor that you have diabetes. What are you the most likely to do? Research on your own what you should do?

*[measured on 7-point Likert scales:*

*1 = Very unlikely,*

*2 = Unlikely,*

*3 = Somewhat unlikely,*

*4 = Neither likely nor unlikely,*

*5 = Somewhat likely,*

*6 = Likely,*

*7 = Very likely]*
